***Wolbachia* in the spittlebug *Prosapia ignipectus*: Variable infection frequencies, but no apparent effect on host reproductive isolation**

Timothy B. Wheeler<sup>†</sup>, Vinton Thompson<sup>§</sup>, William R. Conner<sup>†</sup>, and Brandon S. Cooper<sup>†,\*</sup>

<sup>†</sup>Division of Biological Sciences  
University of Montana  
32 Campus Dr.  
Missoula, MT 59812

<sup>§</sup>Division of Invertebrate Zoology  
American Museum of Natural History  
Central Park West at 79<sup>th</sup> St.  
New York, NY 10024

\*Corresponding Author  
Brandon S. Cooper  
Division of Biological Sciences, University of Montana  
32 Campus Dr., Missoula, MT 59812  
[brandon.cooper@umontana.edu](mailto:brandon.cooper@umontana.edu)

**Keywords:** Cercopidae, cytoplasmic incompatibility, endosymbiosis, host-microbe interaction, speciation

## 1 **Abstract**

2           Animals serve as hosts for complex communities of microorganisms, including  
3 endosymbionts that live inside their cells. *Wolbachia* bacteria are perhaps the most common  
4 endosymbionts, manipulating host reproduction to propagate. Many *Wolbachia* cause intense  
5 cytoplasmic incompatibility (CI) that promotes their spread to high and relatively stable  
6 frequencies. *Wolbachia* that cause weak or no CI tend to persist at intermediate, often variable,  
7 frequencies. *Wolbachia* could also contribute to host reproductive isolation (RI), although  
8 current support for such contributions is limited to a few systems. To test for *Wolbachia*  
9 frequency variation and effects on host RI, we sampled several local *Prosapia ignipectus*  
10 (Fitch)(Hemiptera: Cercopidae) spittlebug populations in the northeastern USA over two years,  
11 including closely juxtaposed Maine populations with different monomorphic color forms,  
12 “black” and “lined”. We discovered a group-B *Wolbachia* (*wPig*) infecting *P. ignipectus* that  
13 diverged from group-A *Wolbachia*—like model *wMel* and *wRi* strains in *Drosophila*—6 to 46  
14 MYA. Populations of the sister species *Prosapia bicincta* (Say) from Hawaii and Florida are  
15 uninfected, suggesting that *P. ignipectus* acquired *wPig* after their initial divergence. *wPig*  
16 frequencies were generally high and variable among sites and between years. While phenotyping  
17 *wPig* effects on host reproduction is not currently feasible, the *wPig* genome contains three  
18 divergent sets of CI loci, consistent with high *wPig* frequencies. Finally, Maine monomorphic  
19 black and monomorphic lined populations of *P. ignipectus* share both *wPig* and mtDNA  
20 haplotypes, implying no apparent effect of *wPig* on the maintenance of this morphological  
21 contact zone. We hypothesize *P. ignipectus* acquired *wPig* horizontally as observed for many  
22 *Drosophila* species, and that significant CI and variable transmission produce high but variable  
23 *wPig* frequencies.

24

25

26

27

28

29

30

31

## 32 **Introduction**

33           Animals interact with microorganisms that influence their behavior, physiology, and  
34 fitness (Hurst and Jiggins, 2000; Brownlie *et al.*, 2009; McFall-Ngai *et al.*, 2013; Fredericksen *et*  
35 *al.*, 2017; Gould *et al.*, 2018; Hague, Caldwell and Cooper, 2020). These include associations  
36 between hosts and vertically transmitted endosymbionts that live inside their cells (McCutcheon,  
37 Boyd and Dale, 2019). Hosts may acquire endosymbionts cladogenically from common  
38 ancestors (Raychoudhury *et al.*, 2009; Koga *et al.*, 2013; Toju *et al.*, 2013), from sister species  
39 via hybridization and introgression (Turelli *et al.*, 2018; Cooper *et al.*, 2019), or horizontally in  
40 ways that are not fully understood (O’Neill *et al.*, 1992; Huigens *et al.*, 2000; Ahmed *et al.*,  
41 2015). While few examples exist, endosymbionts can contribute to host reproductive isolation  
42 (RI) and speciation (Coyne and Orr, 2004; Matute and Cooper, 2021), highlighting the  
43 importance of discovering and characterizing endosymbiont-host associations.

44           Maternally transmitted *Wolbachia* bacteria are widely distributed (Werren, Baldo and  
45 Clark, 2008; Zug and Hammerstein, 2012; Weinert *et al.*, 2015), infecting many arthropods and  
46 two groups of parasitic nematodes (Bandi *et al.*, 1998), making *Wolbachia* perhaps the most  
47 common endosymbiont in nature. In *Drosophila*, introgressive and horizontal *Wolbachia*  
48 acquisition seem to predominate (Conner *et al.*, 2017; Turelli *et al.*, 2018; Cooper *et al.*, 2019),  
49 but cladogenic acquisition during host speciation has been observed in other taxa (Raychoudhury  
50 *et al.*, 2009; Gerth and Bleidorn, 2017). Many *Wolbachia* manipulate host reproduction to  
51 propagate in host populations. For example, many strains cause cytoplasmic incompatibility (CI)  
52 that reduces the egg hatch of uninfected embryos fertilized by *Wolbachia*-infected sperm  
53 (Hoffmann and Turelli, 1997). However, if females are also infected, the embryos survive,  
54 “rescuing” CI and promoting *Wolbachia* spread to high frequencies (Hoffmann, Turelli and  
55 Harshman, 1990; Turelli and Hoffmann, 1995; Barton and Turelli, 2011; Kriesner *et al.*, 2013).

56           *Wolbachia* may contribute to host RI (Coyne and Orr, 2004; Matute and Cooper, 2021),  
57 with the best evidence coming from *Drosophila*. *Wolbachia* contribute to assortative mating and  
58 postzygotic isolation between co-occurring *D. paulistorum* semi-species (Miller, Ehrman and  
59 Schneider, 2010), and to reinforcement of isolation between uninfected *D. subquinaria* and  
60 *Wolbachia*-infected *D. recens* (Shoemaker, Katju and Jaenike, 1999; Jaenike *et al.*, 2006). In  
61 contrast, *Wolbachia* do not contribute to RI in the *D. yakuba* clade, which includes *wYak*-  
62 infected *D. yakuba*, *wSan*-infected *D. santomea*, and *wTei*-infected *D. teissieri* (Cooper *et al.*,

63 2017). Thus, while some results from *Drosophila* strongly support contributions of *Wolbachia* to  
64 RI, and interest in the possibility of such effects remains high, it is unknown whether *Wolbachia*  
65 effects on RI are common in nature.

66 *Wolbachia* frequencies differ significantly among infected host taxa, ranging from very  
67 low to obligately fixed infections (Bandi *et al.*, 1998; Kriesner *et al.*, 2013; Cooper *et al.*, 2017;  
68 Miller, Ehrman and Schneider, 2010). *Wolbachia* effects on reproduction (e.g., CI) and fitness, in  
69 combination with imperfect maternal transmission, govern its frequencies in host populations  
70 (Caspari and Watson, 1959; Hoffmann, Turelli and Harshman, 1990). Intensive sampling of a  
71 few systems has revealed both stable and variable *Wolbachia* frequencies within host  
72 populations. *Wolbachia* that cause intense CI, like *w*Ri in *Drosophila simulans*, persist at high  
73 and relatively stable frequencies, balanced by imperfect maternal transmission (Kriesner *et al.*,  
74 2013; Turelli *et al.*, 2018). In contrast, *Wolbachia* that cause weak or no CI tend to occur at  
75 variable intermediate frequencies (Hoffmann, Clancy and Duncan, 1996; Hamm *et al.*, 2014;  
76 Kriesner *et al.*, 2016; Cooper *et al.*, 2017; Meany *et al.*, 2019). These include *w*Mel-like  
77 *Wolbachia* frequencies that vary spatially in *D. melanogaster* and *D. yakuba* (Kriesner *et al.*,  
78 2016; Hague *et al.*, 2020), and temporally in *D. yakuba* and *D. santomea* (Cooper *et al.*, 2017;  
79 Hague, Caldwell and Cooper, 2020). In all but a few systems, limited sampling has left a gap in  
80 knowledge about whether *Wolbachia* frequency variation is common (Hughes *et al.*, 2011;  
81 Hamm *et al.*, 2014; Cattel *et al.*, 2016; Schuler *et al.*, 2016; Ross *et al.*, 2020).

82 *Prosapia ignipectus* (Fitch) (Hemiptera: Cercopidae) is one of about 14 species of  
83 *Prosapia* and one of two commonly found in the USA, the other being its sister species *P.*  
84 *bicincta* (Say)(Hamilton, 1977). *P. ignipectus* occurs in southern Ontario, Canada and the  
85 northeastern USA from Minnesota to Maine (Hamilton, 1977, 1982; Peck, 1999; Carvalho and  
86 Webb, 2005; Thompson and Carvalho, 2016). These species vary in male genital morphology  
87 and in associations with host plants, with *P. ignipectus* monophagous on the late season C4  
88 perennial grass *Schizachyrium scoparium* (Little bluestem) (Hamilton, 1982; Thompson, 2004)  
89 and *P. bicincta* polyphagous on a variety of C4 grasses, but not including Little bluestem (Fagan  
90 and Kuitert, 1969; Thompson, 2004). Both species have conspicuous dorsal coloration, standing  
91 out against their respective host plants. All *P. bicincta* individuals have a single narrow  
92 transverse orange line across the widest part of the pronotum and a pair of narrow orange lines  
93 across the elytra. Most *P. ignipectus* individuals have a solid black dorsal surface, but in Maine

94 some *P. ignipectus* have *P. bicincta*-like coloration (Figure 1). Notably, only 10 km separate  
95 monomorphic black and monomorphic lined *P. ignipectus* populations in western Maine, with  
96 little evidence of a hybrid zone and no obvious physical barriers to mixing across the boundary  
97 (Thompson and Carvalho, 2016). This morphological contact zone has persisted for at least 90  
98 years. About 45 km southwest of this abrupt transition between aposematic color forms, three  
99 other *P. ignipectus* populations were found to be polymorphic with both black and lined forms—  
100 these populations are surrounded by monomorphic black populations. It has been hypothesized  
101 that *Wolbachia* determined RI may contribute to preservation of the sharp Maine morphological  
102 contact zone (Thompson and Carvalho, 2016).

103 Here, we use collections of *P. ignipectus* from several sites in the northeastern USA  
104 across two years, in combination with collections of *P. bicincta* from Hawaii and Florida, USA,  
105 to assess modes of *Wolbachia* acquisition and to test for *Wolbachia* frequency variation through  
106 space and time. By sampling monomorphic black and lined populations and typing both  
107 *Wolbachia* and mtDNA haplotypes, we also test for contributions of *Wolbachia* to host RI.  
108 Finally, we generate whole genome *Wolbachia* data for phylogenetic analysis and to search for  
109 loci associated with inducing and rescuing CI (Beckmann, Ronau and Hochstrasser, 2017;  
110 LePage *et al.*, 2017; Shropshire *et al.*, 2018).

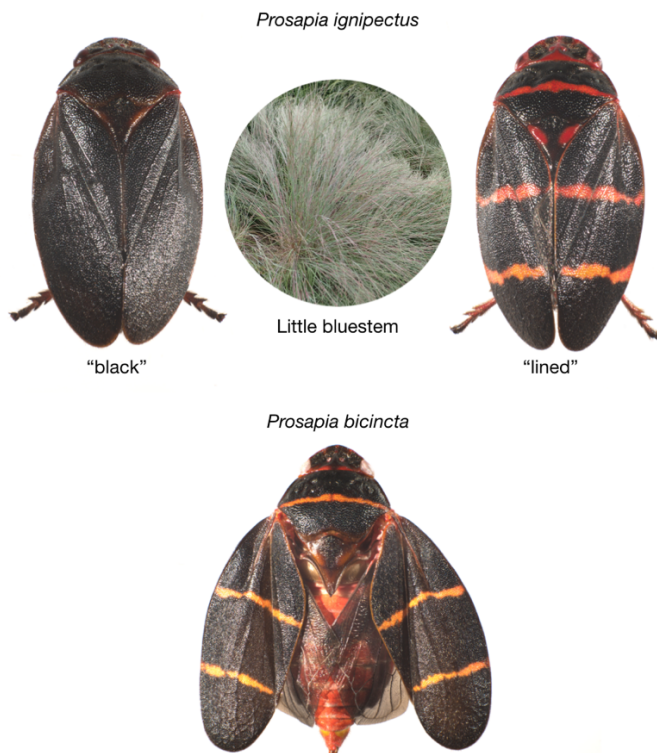

**Figure 1.** Sister species *P. ignipectus* and *P. bicincta* have conspicuous dorsal coloration. All *P. bicincta* individuals have a single narrow transverse orange line across the widest part of the pronotum and a pair of narrow orange lines across the elytra. Most *P. ignipectus* individuals have a solid black dorsal surface, but in Maine some *P. ignipectus* have *P. bicincta*-like coloration. *P. ignipectus* monophagous on the late season C4 perennial grass *Schizachyrium scoparium* (Little bluestem). Little bluestem photo by Krzysztof Ziarnik, Kenraiz (CC BY-SA 4.0, <https://creativecommons.org/licenses/by-sa/4.0>).

## 112 **Methods**

### 113 **Sampling**

114 We netted specimens from Little bluestem; sorted them by species, sex, and color form;  
115 and preserved them in 95% ethanol. The 2019 specimens ( $N = 4$  sites) were collected on August  
116 23. The 2020 specimens ( $N = 9$  sites) were collected on August 9 (Silver Lake, NH), August 17  
117 (Wonalancet, NH), and August 20 (all Maine localities) (Supplemental Table 1). Collection sites  
118 were on the verges of public rights of way or privately owned land. In two cases (New Vineyard  
119 and New Portland) they correspond to sites reported in Thompson and Carvalho (2016).  
120 Specimens were collected near the height of abundance for *P. ignipectus*, which starts to emerge  
121 in adult form in late July and early August. We also sampled three additional spittlebug species  
122 at these sites: *Lepyronia quadrangularis* (Say) ( $N = 25$ ), *Philaenus spumarius* (L.) ( $N = 5$ ), and  
123 *Philaenarcys killa* (Hamilton) ( $N = 24$ ), all of the family Aphrophoridae. Like, *P. ignipectus*, *P.*  
124 *killa* is a monophage on Little bluestem. *L. quadrangularis* is a polyphage but often abundant on  
125 Little bluestem. *P. spumarius* is an extreme polyphage, with a preference for forbes (herbaceous  
126 perennial dicots) but is occasionally collected from Little bluestem in the company of *P.*  
127 *ignipectus*. By screening them for *Wolbachia* we tested for the possibility of horizontal  
128 *Wolbachia* transfer through plant interactions (Chrostek *et al.*, 2017). Lastly, because  
129 identification of infections in sister hosts enables formal analysis of modes of *Wolbachia*  
130 acquisition (Turelli *et al.*, 2018; Conner *et al.*, 2017; Cooper *et al.*, 2019; Raychoudhury *et al.*,  
131 2009), we also obtained samples of the sister species *P. bicincta* from Hawaii ( $N = 60$ ) and  
132 Florida ( $N = 40$ ) to screen for infections. *P. bicincta* is native to the southeastern USA (Fagan  
133 and Kuitert, 1969; Thompson and Carvalho, 2016), but has recently been introduced into the  
134 Kona Region of Big Island, Hawaii (Thorne *et al.*, 2018).

135

### 136 ***Wolbachia* typing**

137 We generated whole genome *Wolbachia* data to type the *Wolbachia* infecting *P.*  
138 *ignipectus* and to search for loci associated with CI. We extracted 800ng of high molecular  
139 weight DNA (Qiagen Genomic-tip 20/G; Qiagen, Germany) from one black New Vineyard  
140 female (see below), and then input and sequenced it (Ligation Sequencing Kit, SQK-LSK109;  
141 FLO-MIN106 flow cell) for 48 hours (Oxford Nanopore Technologies). We mapped raw  
142 nanopore reads (5.8Gb of data) to all known *Wolbachia* sequences (NCBI taxid 953) with

143 BLASTn and extracted reads where at least 60% of their length mapped (qcovs >= 60). We then  
144 corrected and assembled reads using canu 2.1.1 (Koren *et al.*, 2017, 2018; Nurk *et al.*, 2020) and  
145 polished the *Wolbachia* assembly using nanopolish 0.13.2 (Loman, Quick and Simpson, 2015).  
146 We annotated our *Wolbachia* assembly plus the genomes of model group-A (*wMel*, Wu *et al.*,  
147 2004; and *wRi*, Klasson *et al.*, 2009) and group-B (*wPip-Pel*, Klasson *et al.*, 2008; and *wMau*,  
148 Meany *et al.*, 2019) strains using Prokka v.1.11 (Seemann, 2014). We used only genes present in  
149 single copy and with identical lengths in all genomes. To assess the quality of our assembly, we  
150 excluded *wPig* and repeated this with only *wMel*, *wRi*, *wPip*, and *wMau*.

151 Preliminary analysis of a few loci placed the *P. ignipectus Wolbachia* in group-B (see  
152 below), but we performed Bayesian analyses using the GTR +  $\Gamma$  + I model for sequence  
153 evolution using whole genome data to confirm this (Höhna *et al.*, 2016). Genes were  
154 concatenated and partitioned by codon position, with a rate multiplier,  $\sigma$ , assigned to each  
155 partition to accommodate variable substitution rates. We used flat, symmetrical Dirichlet priors  
156 on the stationary base frequencies,  $\pi$ , and the relative-rate parameters,  $\eta$ , of the GTR model (i.e.,  
157 Dirichlet(1,1,1...)). As in Turelli *et al.* (2018), we used a  $\Gamma(2,1)$  hyperprior on the shape  
158 parameter,  $\alpha$ , of the discrete- $\Gamma$  model (adopting the conventional assumption that the  $\beta$  rate  
159 parameter equals  $\alpha$ , so that the mean rate is 1; (Yang, 1994). The  $\Gamma$  model for rate variation  
160 assigns significant probability near zero when the  $\alpha < 1$  (accommodating invariant sites). The  
161  $\Gamma(2,1)$  hyperprior on  $\alpha$  assigns 95% probability to the interval (0.36, 4.74), allowing for small  
162 and large values. Four independent runs for each gene set produced concordant topologies. We  
163 diagnosed MCMC performance using Tracer 1.7 (Rambaut *et al.*, 2014).

164

### 165 ***Wolbachia* and mtDNA haplotyping of black and lined color morphs**

166 To confirm that the same *Wolbachia* strain infects different *P. ignipectus* populations and  
167 color morphs, we amplified and Sanger sequenced five protein-coding *Wolbachia* genes (*coxA*,  
168 *hcpA*, *fbpA*, *ftsZ*, and *wsp*) in both directions (Eurofins Genomics LLC, Louisville,  
169 Kentucky)(see below, Supplemental Table 2). We also amplified and Sanger sequenced *gatb*, but  
170 sequence quality was consistently too low to include in our analyses. Samples included one  
171 infected female of each color form (black or lined), from each of the four populations (Carthage,  
172 New Portland, New Vineyard, and Strong) sampled in both years (Supplemental Table 1).

173 To specifically assess if *Wolbachia* might contribute to the morphological contact zone  
174 between New Vineyard (monomorphic black) and New Portland (monomorphic lined) *P.*  
175 *ignipectus*, we also we amplified and Sanger sequenced the *cytochrome C oxidase I (CoI)*  
176 mitochondrial locus from one male and one female from these populations, with the exception of  
177 one (New Vineyard black male) that did not produce usable sequence. We also produced *CoI*  
178 sequences for one black and one lined female from the polymorphic Strong population.

179 We visually inspected each sequence for quality and ambiguities, and consensus  
180 sequences were used as queries for a BLASTn search and the NCBI “nr” database to confirm  
181 that orthologous genes were amplified (Altschul *et al.*, 1990). We then used the “multiple locus  
182 query” function of the multi locus sequence typing (MLST) database to type *Wolbachia* (Baldo  
183 *et al.*, 2006). Together these data enable us to test for differentiation in *Wolbachia* and mtDNA  
184 between populations and color forms, including between populations monomorphic for different  
185 color forms separated by only 10 km in Maine.

186

### 187 **Analysis of CI loci**

188 Recent work has identified CI-causing factors (*cifs*) associated with WO prophage in  
189 *Wolbachia* genomes (Beckmann, Ronau and Hochstrasser, 2017; LePage *et al.*, 2017; Shropshire  
190 *et al.*, 2018; Shropshire and Bordenstein, 2019; Shropshire, Leigh and Bordenstein, 2020). Two  
191 genes (*cifA/B*) transgenically expressed in male *D. melanogaster* induce CI, while one gene  
192 (*cifA*) expressed in females rescues it. To identify *cif* loci, we used BLASTn to search for *cif*  
193 homologs in our whole genome raw reads, querying the Type 1 *cif* pair in *wMel*, the Type 2 pair  
194 in *wRi*, the Type 3 pair in *wNo*, the Type 4 pair in *wPip*, and the Type 5 pair in *wStri* (Lindsey *et*  
195 *al.*, 2018; Bing *et al.*, 2020; Martinez *et al.*, 2020). We later broadened our search for Type 1  
196 pairs by querying *wPip* and *wNP*a pairs (Klasson *et al.*, 2008; Gerth and Bleidorn, 2017). For  
197 each Type, we extracted raw reads that covered at least 40% of the genes. We then corrected and  
198 assembled the reads with canu 2.1.1 (Koren *et al.*, 2017, 2018; Nurk *et al.*, 2020), producing  
199 sequences with about a 1% error rate. We limit our analyses to the discovery of *cif* types, since  
200 we did not generate additional sequence data to further correct the long reads. The assembled  
201 genes were compared to those in Martinez *et al.* (2020).

202

203



## 204 **Analysis of *Wolbachia* frequency variation**

205 To test for *Wolbachia* frequency variation, we extracted DNA from many individuals  
206 from each collection using a standard squish buffer protocol and identified *Wolbachia* infections  
207 using polymerase chain reaction (PCR) (Simpliamp ThermoCycler; Applied Biosystems,  
208 Singapore) (Meany *et al.*, 2019). We amplified the *Wolbachia* surface protein (*wsp*) (Braig *et al.*,  
209 1998) and arthropod-specific 28S rDNA, which served as a positive control (Baldo *et al.*, 2006)  
210 (Supplemental Table 2). PCR products were visualized using 1% agarose gels. Assuming a  
211 binomial distribution, we estimated exact 95% confidence intervals for *Wolbachia* frequencies  
212 for each collection. We used Fisher's exact test (FET) to determine differences in frequencies  
213 among sites, between years, between sexes, and between color forms.

214

## 215 **Results**

216

### 217 ***P. ignipectus* likely acquired its group-B *Wolbachia* following initial divergence from *P.*** 218 ***bicincta***

219 Across all samples, *Wolbachia* infection frequency ( $p$ ) in *P. ignipectus* is high ( $p = 0.93$   
220 [0.90, 0.95];  $N = 486$ ). Based on five Sanger sequenced loci, the multiple sequence query of the  
221 MLST database supports that a group-B strain, most closely related to *Wolbachia* in Chloropidae  
222 (Diptera) (ID 93, ST 104), infects our *P. ignipectus* samples—we call this strain *wPig*.  
223 Preliminary phylogenetic analyses using only our five Sanger sequenced genes also placed *wPig*  
224 in group B. Our draft *wPig* assembly size (1.32Mb,  $N50 = 91,011$ ) falls in the range of complete  
225 *Wolbachia* genomes (e.g., *wMel* at 1.26Mb and *wRi* at 1.44Mb), despite its fragmentation (50  
226 contigs). In total, we extracted 65 single-copy homologs of equal length (43,473 total bp) for our  
227 phylogenetic analysis, which also places *wPig* in group B (Figure 2). When excluding the *wPig*  
228 genome, we were able to extract an additional 135 homologs (16,7241 bp) from *wMel*, *wRi*,  
229 *wPip*, and *wMau*. This indicates that significant residual error in the *wPig* assembly reduces the  
230 number of homologs meeting our equal length criteria for inclusion. Finer placement of *wPig*  
231 among group-B strains will require the generation of short-read data to further correct our draft  
232 *wPig* assembly. Thus, we do not attempt to place *wPig* precisely among group-B strains.

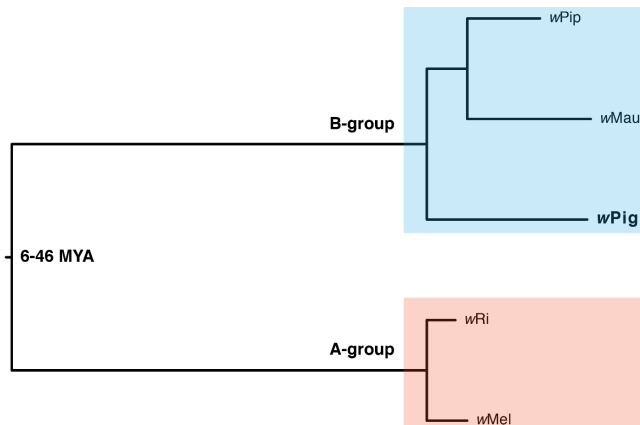

**Figure 2.** An estimated phylogram for model group-A (wRi, Klasson *et al.*, 2009); and (wMel, Wu *et al.*, 2004) and group-B (wPip\_Pel, Klasson *et al.*, 2008); and (wMau, Meany *et al.*, 2019) *Wolbachia*, plus wPig. All nodes have Bayesian posterior probabilities of 1. The divergence time of groups A and B is superimposed from (Meany *et al.*, 2019). The phylogram shows significant variation in the substitution rates across branches, with long branches separating groups A and B.

233

234

235

236

237

238

239

240

241

242

243

244

245

246

247

248

249

250

251

252

253

254

255

256

None of the *P. bicincta* samples from Hawaii and Florida were *Wolbachia* infected. Even if some *P. bicincta* are *Wolbachia* infected, as previously reported for one individual used as a PCR control in another study (Anderson, Rustin and Eremeeva, 2019), *Wolbachia* infection frequency ( $p$ ) must be very low across the *P. bicincta* range, given our species estimate and credible interval ( $p = 0.0$  [0.0, 0.04];  $N = 100$ ), keeping in mind the possibility that the Hawaiian population may have experienced a recent bottleneck during introduction and may not be representative of the species in the native range. Very low frequency *Wolbachia* infections in global *P. bicincta* populations, in combination with generally high wPig frequencies in *P. ignipectus*, indicates that *P. ignipectus* likely acquired wPig after its initial divergence from *P. bicincta*. Because testing predictions about modes of *Wolbachia* acquisition requires formal analysis of *Wolbachia*, host nuclear, and host mtDNA phylograms and chronograms, we are unable to distinguish between introgressive and horizontal wPig transfer (Raychoudhury *et al.*, 2009; Conner *et al.*, 2017; Gerth and Bleidorn, 2017; Turelli *et al.*, 2018; Cooper *et al.*, 2019). We discuss this further below.

Of the additional species we netted from Little bluestem, all *L. quadrangularis* were uninfected ( $p = 0.0$  [0.0, 0.14];  $N = 25$ ), all *P. spumarius* were infected ( $p = 1.0$  [0.48, 1.0];  $N = 5$ ), and only one *P. killa* individual was infected ( $p = 0.04$  [0.001, 0.21];  $N = 24$ ). Because *Wolbachia* that infect *P. spumarius* and wPig in *P. ignipectus* are both at high frequency, we also typed the *Wolbachia* infecting *P. spumarius* to determine if a wPig-like variant also infects this host species. The multiple sequence query in the MLST database supports that a different group-B strain, most closely related to the thrip species *Aptinothrips rufus* (ID 1945, ST 509) infects *P. spumarius*. Generating more sequence data will be required to resolve the phylogenetically

257 relationships of these and other group-B strains, including *Wolbachia* in *P. spumarius* (Lis,  
258 Maryańska-Nadachowska and Kajtoch, 2015).

259 **No apparent effect of wPig on the maintenance of the morphological *P. ignipectus* contact**  
260 **zone**

261 The Strong, Carthage, and Dixfield *P. ignipectus* populations (Figure 3) were  
262 polymorphic for the black and lined forms (Figure 1, Supplemental Table 1), like three  
263 populations close to Rumford, Maine sampled in earlier work (Thompson and Carvalho, 2016).  
264 This set of mixed color-form populations runs roughly from Rumford northeast to Strong, but  
265 not to the sharp boundary dividing the monomorphic black New Vineyard population from the  
266 monomorphic lined New Portland population. It has the appearance of a hybrid zone, but one  
267 that does not reach the definitive boundary between the forms. The existence of distinct color  
268 forms both within and between the populations sampled facilitated investigation of the  
269 relationship, if any, between *Wolbachia* infection and patterns of color form occurrence.  
270

**Table 1.** wPig infection frequencies in *P. ignipectus* at each sampled site across both years.

| Site         | GPS coordinates      | N   | Infected | p [Confidence Interval] |
|--------------|----------------------|-----|----------|-------------------------|
| Carthage     | 44 36 44N, 70 28 10W | 116 | 98       | 0.84 [0.77, 0.91]       |
| New Portland | 44 52 17N, 70 07 00W | 72  | 68       | 0.94 [0.86, 0.98]       |
| New Vineyard | 44 45 14N, 70 08 01W | 77  | 67       | 0.87 [0.77, 0.94]       |
| Strong       | 44 47 08N, 70 13 42W | 69  | 68       | 0.99 [0.92, 1.0]        |
| Silver Lake  | 43 53 01N, 71 10 41W | 20  | 19       | 0.95 [0.75, 1.0]        |
| Dixfield     | 44 34 10N, 70 27 21W | 41  | 41       | 1.0 [0.91, 1.0]         |
| Weld         | 44 41 27N, 70 25 30W | 33  | 32       | 0.97 [0.84, 1.0]        |
| Wilton       | 44 37 58N, 70 18 10W | 26  | 26       | 1.0 [0.87, 1.0]         |
| Wonalancet   | 43 54 38N, 71 21 29W | 32  | 31       | 0.97 [0.84, 1.0]        |

Sample sizes (*N*), infection frequencies (*p*), and exact 95% binomial confidence intervals for each site.

271  
272 We found no evidence for wPig genetic differentiation between *P. ignipectus* populations  
273 or color forms. Regions of the five wPig genes we sequenced were identical, except for a single  
274 nucleotide position in *wsp*, where the Strong lined sample differed from all others. In addition to  
275 populations sharing wPig type based on MLST loci, wPig frequency did not vary between color

276 forms (black:  $p = 0.93$  [0.90, 0.95],  $N = 338$ ; lined:  $p = 0.92$  [0.86, 0.96],  $N = 123$ ; FET,  $P =$   
277 0.69), among only males (black:  $p = 0.84$  [0.75, 0.90],  $N = 98$ ; lined:  $p = 0.90$  [0.79, 0.97],  $N =$   
278 51; FET,  $P = 0.33$ ), or among females (black:  $p = 0.97$  [0.94, 0.99],  $N = 240$ ; lined:  $p = 0.93$   
279 [0.85, 0.98],  $N = 72$ ; FET,  $P = 0.19$ ), across all samples. *wPig* frequency also did not differ  
280 between New Vineyard (monomorphic black) and New Portland (monomorphic lined)  
281 populations (FET,  $P = 0.16$ ).

282 We found no evidence for differentiation in *CoI* mtDNA haplotype between the New  
283 Vineyard and New Portland *P. ignipectus* populations, where all samples were identical across  
284 the 680 bp that we recovered. The black and lined females from the polymorphic Strong  
285 population also did not differ from each other, or from other populations, across this region.  
286 Thus, *wPig* and mtDNA haplotypes were not differentiated between populations or color forms..

287 Our mtDNA haplotypes are also very similar to ten *P. ignipectus* samples included in the  
288 Barcode of Life Database (BOLD) (Footit, Maw and Hebert, 2014). A single base-pair insertion  
289 present in all of our samples is absent from all ten BOLD samples. Four other sites in *CoI* that  
290 are polymorphic among the BOLD samples are fixed in our samples for one of the BOLD  
291 alleles. mtDNA haplotypes of *P. ignipectus* and *P. bicincta* also differ by less than 2 percent  
292 (Footit, Maw and Hebert, 2014).

293

### 294 **The *wPig* genome contains three divergent types of *CI* loci**

295 We identified Type 1, 3, and 4 *cifs* in the *wPig* genome (Martinez *et al.*, 2020). This  
296 specific complement of *cifs* is not found in any other published *Wolbachia* genomes, but  
297 close relatives to each *wPig cif* Type are. For instance, the *wPig* Type 1 genes are 99% identical  
298 to those in the genome of the *Wolbachia* infecting the gall-inducing wasp *Diplolepis spinosa*  
299 (Cynipidae), but less than 90% similar to any others (Martinez *et al.*, 2020). The Type 3 *wPig*  
300 genes are 99% identical to those in the genome of the *Wolbachia* infecting *D. spinosa*, the  
301 Staphylinid beetle *Diploeciton nevermanni*, and the water strider *Gerris buenoi*. The *wPig* Type  
302 4 genes are 99% identical to those in *Wolbachia* infecting *Nomada* bees (*wNLeu*, *wNFla*, and  
303 *wNPa*), but less than 95% identical to other Type 4 *cifs*. The *Wolbachia* infecting *D. spinosa*  
304 does not have Type 4 *cifs*, distinguishing it from *wPig*. None of the *wPig cifs* are truncated  
305 relative to copies with 99% identity. Additional sequencing is required to make more detailed *cif*  
306 comparisons.

### 307 Pervasive *w*Pig frequency variation

308 *w*Pig varied in frequency in several ways. First, frequency varied spatially among all  
309 samples (FET,  $P = 0.001$ )(Table 1), among sites in 2019 (FET,  $P < 0.0001$ ), and 2020 (FET,  $P =$   
310  $0.033$ ). This variation occurred over a geographic radius of only 20 km in 2019 and 70 km in  
311 2020 (Figure 3). Second, frequency varied across all samples between 2019 ( $p = 0.88$  [0.82,  
312 0.92];  $N = 169$ ) and 2020 ( $p = 0.95$  [0.92, 0.97];  $N = 317$ ) (FET,  $P = 0.003$ ). For the four sites we  
313 sampled in both years, frequencies were only significantly different between 2019 ( $p = 0.73$   
314 [0.56, 0.86];  $N = 37$ ) and 2020 ( $p = 1.0$  [0.91, 1.0];  $N = 40$ ) in New Vineyard (FET,  $P < 0.001$ ).  
315 Third, across all samples *w*Pig frequency was higher in females ( $p = 0.95$  [0.93, 0.97];  $N = 332$ )  
316 than males ( $p = 0.86$  [0.80, 0.91];  $N = 154$ ) (FET,  $P = 0.001$ ). However, this was driven mostly  
317 by a paucity of infected males in New Vineyard (males:  $p = 0.69$  [0.50, 0.84],  $N = 32$ ; females:  $p$   
318  $= 1.0$  [0.92, 1.0],  $N = 45$ ; FET,  $P < 0.0001$ ), with no differences in *w*Pig frequency between  
319 males and females in other populations. *w*Pig frequency in males was relatively low in 2019 ( $p =$   
320  $0.17$  [0.02, 0.48];  $N = 12$ ), but fixed in 2020 ( $p = 1.0$  [0.83, 1.0];  $N = 20$ ). We interpret these  
321 results as pervasive spatial, and rare temporal and sex-specific, variation in *w*Pig frequency.

322

323

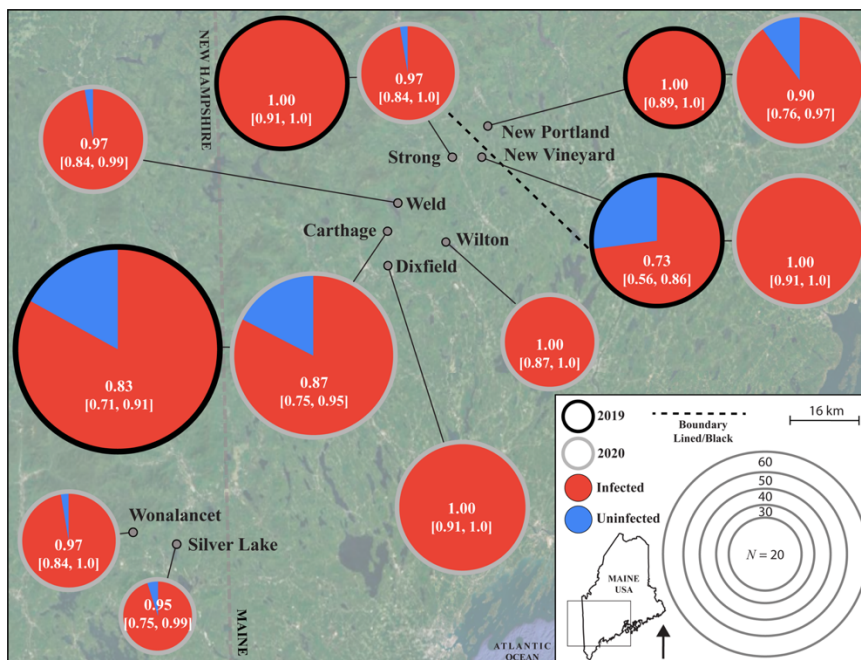

**Figure 3.** *w*Pig frequency varies through space and time. Circle size denotes sample size, with outline and fill color denoting sampling year and infection status, respectively. Sample means and 95% binomial confidence intervals are reported for each sample. The dashed back line denotes the geographical separation of monomorphic black and monomorphic lined *P. ignipectus* populations.

324

325

## 326 **Discussion**

327 Our results suggest that *wPig* is a group-B *Wolbachia* acquired after the initial divergence  
328 of *P. ignipectus* from *P. bicincta*. Analysis of *Wolbachia* and mtDNA haplotypes indicates that  
329 *wPig* has no apparent effect on the *P. ignipectus* morphological contact zone in Maine. Across all  
330 samples, *wPig* occurs at very high frequencies, consistent with our discovery of three divergent  
331 sets of CI loci in the *wPig* genome. Finally, we document pervasive spatial, and rare temporal,  
332 *wPig* frequency variation. We discuss this in more detail below.

333

### 334 ***Wolbachia* acquisition in spittlebugs**

335 In contrast to very high *wPig* frequencies in *P. ignipectus*, we found no evidence of  
336 *Wolbachia* in our sample of 100 *P. bicincta*. A prior report of one infected *P. bicincta* sample  
337 indicates that *Wolbachia* could infect this species (Anderson, Rustin and Eremeeva, 2019). If so,  
338 it must be at very low frequencies, given our credible interval here ( $p = 0.0$  [0.0, 0.04];  $N = 100$ ).  
339 Mathematical models predict that intense CI drives *Wolbachia* to high frequencies, balanced by  
340 imperfect maternal transmission (Hoffmann, Turelli and Harshman, 1990; Turelli and Hoffmann,  
341 1995); conversely, *Wolbachia* that do not cause strong CI tend to occur at much lower  
342 frequencies (Hamm *et al.*, 2014; Kriesner *et al.*, 2016; Cooper *et al.*, 2017; Hague *et al.*, 2020).  
343 While crossing to test for CI in the laboratory is not currently feasible in this system, the  
344 presence of three sets of CI loci in the *wPig* genome, combined with its very high frequencies,  
345 suggests that *wPig* causes intense CI.

346 How did *P. ignipectus* acquire *wPig*? There are three possibilities: cladogenic  
347 transmission from its most recent common ancestor with its sister species, presumably *P.*  
348 *bicincta* or a close relative; by introgression from *P. bicincta* or another close relative; or by  
349 horizontal transmission (O'Neill *et al.*, 1992). Given that we find no evidence for a high  
350 frequency *Wolbachia* in *P. bicincta*, cladogenic acquisition seems implausible. Without more  
351 extensive analysis of close relatives, we cannot rule out introgression. However, opportunities  
352 for introgression with species other than *P. bicincta* have likely been limited. Other species of  
353 the genus *Prosapia* or family Cercopidae occur no further north than the USA-Mexico border  
354 region, about 1,400 km from the nearest *P. ignipectus* populations and 3,000 km from the  
355 populations studied here.

356 Overall, the limited data are consistent with relatively recent non-cladogenic  
357 transmission, a process that seems to be common among *Drosophila* species (Turelli *et al.*,  
358 2018). It may also be common among spittlebugs. This would be in stark contrast to obligate  
359 transovarial endosymbionts associated with amino acid nutrition in spittlebugs and other  
360 hemipterans (Koga *et al.*, 2013). In addition to the thrip-related *Wolbachia* found in *P. spumarius*  
361 in this study, Nakabachi *et al.* (2020) report that two spittlebug species, *Aphrophora*  
362 *quadrinotata* Say and *Philaenus maghresignus* Drosopoulos & Remane (both *Aphrophoridae*),  
363 harbor *Wolbachia* with 16S rRNA sequence that is identical to *Wolbachia* in two psyllid species,  
364 two whiteflies, an aphid, a planthopper, two leafhoppers, two grasshoppers, a mosquito and a  
365 weevil. Likewise, Lis *et al.* (2015) report that *Wolbachia* they studied in *P. spumarius* is closely  
366 related to strains in vespids, drosophilids, whiteflies, chrysomelid beetles and weevils based on  
367 five MLST loci. Kapantaidaki *et al.* (2021) also report *Wolbachia* infections at low levels in *P.*  
368 *spumarius*, as well as higher frequencies in *Neophilaenus campestris* (Fallén) (*Aphrophoridae*).  
369 Based on five MLST loci, their *N. campestris* strain is closely related to *Wolbachia* found in a  
370 leafhopper (Hemiptera) and cluster with *Wolbachia* from a planthopper, a scale insect and a  
371 psyllid (all Hemiptera), as well as two chrysomelid beetles, two butterflies, a parasitic wasp and  
372 a mosquito. Koga *et al.* (2013, table S3) report the presence of *Wolbachia* in the spittlebug  
373 *Cosmoscarta heros* (F.) (*Cercopidae*), in addition to *A. quadrinotata* and *P. maghresignus*.

374 In contrast, five specimens of *Poophilus costalis* (Walker) (*Aphrophoridae*)  
375 (Wiwatanaratanabutr, 2015), six specimens of *Philaenus tessellatus* Melichar (Lis, Maryńska-  
376 Nadachowska and Kajtoch, 2015), 37 specimens of *Philaenus signatus* Melichar (Lis,  
377 Maryńska-Nadachowska and Kajtoch, 2015; Kapantaidaki *et al.*, 2021), and single specimens  
378 of *Philaenus arslani* Abdul-Nour & Lahoud, *Philaenus loukasi* Drosopoulos & Asche, and  
379 *Philaenus tarifa* Remane & Drosopoulos (Lis, Maryńska-Nadachowska and Kajtoch, 2015)  
380 were not infected. Based on limited sequence data, the emerging pattern suggests that *Wolbachia*  
381 infection is widespread, but far from ubiquitous among spittlebugs, and that when it does occur,  
382 it often involves *Wolbachia* strains similar to those infecting distantly related insects. Whole  
383 *Wolbachia* and host genomic data is sorely needed to test our hypothesis that horizontal  
384 *Wolbachia* acquisition might be common in spittlebugs.

385  
386

387 **Little contribution of wPig to the *P. ignipectus* morphological contact zone**

388 We find no evidence for differentiation in wPig or mtDNA haplotypes among *P.*  
389 *ignipectus* color forms. This includes the monomorphic black (New Vineyard) and lined (New  
390 Portland) populations that are separated by only 10 km in Maine, with no obvious barriers to  
391 dispersal or reproduction (Thompson and Carvalho, 2016). We also found no variation in wPig  
392 or mtDNA haplotypes between black and lined individuals in the polymorphic Strong  
393 population. wPig frequency also did not vary between color forms. These data indicate that wPig  
394 is unlikely to significantly contribute to the maintenance of the *P. ignipectus* morphological  
395 contact zone.

396 How common are *Wolbachia* effects on host RI? Obligate *Wolbachia* infections in co-  
397 occurring *D. paulistorum* semi-species contribute to assortative mating and generate hybrid  
398 inviability and male sterility (Miller, Ehrman and Schneider, 2010). *Wolbachia* also contribute to  
399 reinforcement between *Wolbachia*-infected *D. recens* and uninfected *D. subquinaria*  
400 (Shoemaker, Katju and Jaenike, 1999; Jaenike *et al.*, 2006). In contrast, *Wolbachia* do not  
401 contribute to premating, gametic, or postzygotic RI among the three *D. yakuba*-clade host  
402 species (Cooper *et al.*, 2017). While the crossing schemes used in these *Drosophila* studies to  
403 dissect *Wolbachia* contributions to RI are not feasible in *P. ignipectus* and many other systems,  
404 our genetic data here lend support to our prior conjecture that *Wolbachia* contributions to RI  
405 observed in some *Drosophila* may be the exception rather than the rule (Turelli, Lipkowitz and  
406 Brandvain, 2014; Cooper *et al.*, 2017).

407

408 **Pervasive wPig frequency variation**

409 Mathematical models indicate that imperfect maternal transmission, *Wolbachia* fitness  
410 effects, and the severity of CI govern *Wolbachia* frequencies in host populations. *Wolbachia* that  
411 cause intense CI tend to occur at high and stable frequencies, balanced by imperfect maternal  
412 transmission (Barton and Turelli, 2011; Turelli and Hoffmann, 1995; Hoffmann, Turelli and  
413 Harshman, 1990; Turelli and Hoffmann, 1991; Carrington *et al.*, 2011; Kriesner *et al.*, 2013);  
414 while *Wolbachia* that cause weak or no CI tend to persist at intermediate, often variable  
415 frequencies (Hamm *et al.*, 2014; Kriesner *et al.*, 2016; Cooper *et al.*, 2017; Hague *et al.*, 2020).  
416 Accumulating evidence for variable infection frequencies (Hamm *et al.*, 2014; Kriesner *et al.*,  
417 2016; Schuler *et al.*, 2016; Hughes *et al.*, 2011; Lis, Maryńska-Nadachowska and Kajtoch,



418 2015; Cooper *et al.*, 2017), including our discovery here, highlights that infection frequencies are  
419 not static, even for high frequency variants.

420 With the exception of model systems like *wRi* in *D. simulans*, few estimates of the key  
421 parameters required to approximate population frequency dynamics and equilibria of *Wolbachia*  
422 exist (Turelli and Hoffmann, 1995; Carrington *et al.*, 2011). *wMel*-like *Wolbachia* frequencies in  
423 the *D. yakuba* clade vary through space and time in west Africa (Cooper *et al.*, 2017), due in part  
424 to effects of cold temperatures on *wYak* titer (Hague *et al.*, 2020). CI strength also varies in the  
425 *D. yakuba* clade, which may influence infection frequencies (Cooper *et al.*, 2017; Hague,  
426 Caldwell and Cooper, 2020). *wMel* frequencies vary with latitude in *D. melanogaster*  
427 populations, potentially due to *wMel* fitness costs in the cold (Kriesner *et al.*, 2016).  
428 Interestingly, hot temperatures reduce *wMel* CI strength and transmission in transinfected *Aedes*  
429 *aegypti* used for biocontrol of human disease (Ross *et al.*, 2017, 2020), suggesting that  
430 temperature may generally influence key parameters underlying *Wolbachia* infection  
431 frequencies.

432 What underlies variable *wPig* frequencies in nature? High *wPig* frequencies and the  
433 presence of three divergent sets of *cifs* suggest, but do not confirm, that *wPig* causes strong CI. It  
434 seems plausible that some or all of these loci were horizontally acquired (Cooper *et al.*, 2019),  
435 but additional sequence data are required to test this. We hypothesize that variable *wPig*  
436 transmission rates contribute to the frequency variation we observe, potentially due to  
437 environmental effects on titer, as observed for *wYak* (Hague *et al.*, 2020). Temporal variation in  
438 transmission was also observed for *wRi* between two samples of *D. simulans* collected from  
439 Ivanhoe, California in April and November of 1993 (Turelli and Hoffmann, 1995; Carrington *et*  
440 *al.*, 2011), although the relative stability of *wRi* frequencies in global *D. simulans* populations  
441 suggests that its transmission persists across a range of environmental conditions. Additional  
442 analyses of *Wolbachia* titer and transmission in the field, and across environmental contexts, are  
443 needed to better understand the causes of *Wolbachia* frequency variation. Comparing the titer  
444 and transmission of *Wolbachia* that occur at different frequencies in nature—for example, those  
445 that do and do not cause intense CI—would be particularly useful.

446

#### 447 **Data Accessibility Statement**

448 All data will be uploaded to DRYAD or GenBank upon acceptance.

449 **Competing Interests Statement**

450 We declare no competing interests.

451

452 **Author Contributions Section**

453 **Timothy B. Wheeler:** Data curation, Investigation, Validation, Visualization, Writing - original  
454 draft, Writing - review & editing. **Vinton Thompson:** Conceptualization, Data curation, Formal  
455 analysis, Investigation, Methodology, Project administration, Resources, Visualization, Writing -  
456 original draft, Writing - review & editing. **William R. Conner:** Data curation, Formal analysis,  
457 Investigation, Writing - original draft, Writing - review & editing. **Brandon S. Cooper:**  
458 Conceptualization, Data curation, Formal analysis, Funding acquisition, Investigation,  
459 Methodology, Project administration, Resources, Supervision, Validation, Visualization, Writing  
460 - original draft, Writing - review & editing.

461

462 **Acknowledgments**

463 We thank M. Thorne and A.G. Dale for *P. bicincta* collections and D. McVicar and F. Selchin  
464 for access to the Wonaloncet site. Michael Turelli provided comments that greatly improved an  
465 earlier draft. We also thank M. Hague, D. Shropshire, and K. Van Vaerenberghe for very helpful  
466 comments. Research reported in this publication was supported by the National Institute of  
467 General Medical Sciences of the National Institutes of Health (NIH) under award number  
468 R35GM124701 to B.S.C., and by the University of Montana Genomics Core.

469

470

471

472

473

474

475

476

477

478

479

480 **References**

481

482 Ahmed, M. Z. *et al.* (2015) ‘The intracellular bacterium *Wolbachia* uses parasitoid wasps as  
483 phoretic vectors for efficient horizontal transmission’, *PLoS Pathogens*, 11(2), p. e1004672. doi:  
484 10.1371/journal.ppat.1004672.

485 Altschul, S. F. *et al.* (1990) ‘Basic local alignment search tool’, *Journal of Molecular Biology*,  
486 215(3), pp. 403–410. doi: 10.1016/S0022-2836(05)80360-2.

487 Anderson, M. L., Rustin, R. C. and Eremeeva, M. E. (2019) ‘Pilot survey of mosquitoes  
488 (Diptera: Culicidae) from southeastern Georgia, USA for *Wolbachia* and *Rickettsia felis*  
489 (Rickettsiales: Rickettsiaceae)’, *Journal of Vector Borne Diseases*, 56(2), pp. 92–97. doi:  
490 10.4103/0972-9062.263714.

491 Baldo, L. *et al.* (2006) ‘Multilocus sequence typing system for the endosymbiont *Wolbachia*  
492 *pipientis*’, *Applied and environmental microbiology*, 72(11), pp. 7098–7110.

493 Bandi, C. *et al.* (1998) ‘Phylogeny of *Wolbachia* in filarial nematodes’, *Proceedings of the Royal*  
494 *Society of London. Series B: Biological Sciences*, 265(1413), pp. 2407–2413.

495 Barton, N. and Turelli, M. (2011) ‘Spatial waves of advance with bistable dynamics: cytoplasmic  
496 and genetic analogues of Allee effects’, *The American Naturalist*, 178(3), pp. E48–E75.

497 Beckmann, J. F., Ronau, J. A. and Hochstrasser, M. (2017) ‘A *Wolbachia* deubiquitylating  
498 enzyme induces cytoplasmic incompatibility’, *Nature Microbiology*, 2(5), p. 17007.

499 Bing, X.-L. *et al.* (2020) ‘Genomic analysis of *Wolbachia* from *Laodelphax striatellus*  
500 (Delphacidae, Hemiptera) reveals insights into its “Jekyll and Hyde” mode of infection pattern’,  
501 *Genome Biology and Evolution*, 12(2), pp. 3818–3831. doi: 10.1093/gbe/evaa006.

502 Braig, H. R. *et al.* (1998) ‘Cloning and characterization of a gene encoding the major surface  
503 protein of the bacterial endosymbiont *Wolbachia pipientis*’, *Journal of Bacteriology*, 180(9), pp.  
504 2373–2378. doi: 10.1128/JB.180.9.2373-2378.1998.

505 Brownlie, J. C. *et al.* (2009) ‘Evidence for metabolic provisioning by a common invertebrate  
506 endosymbiont, *Wolbachia pipientis*, during periods of nutritional stress’, *PLoS Pathogens*, 5(4),  
507 p. e1000368.

508 Carrington, L. B. *et al.* (2011) ‘A re-examination of *Wolbachia*-induced cytoplasmic  
509 incompatibility in California *Drosophila simulans*’, *PLoS One*, 6(7), p. e22565.

510 Carvalho, G. S. and Webb, M. D. (2005) *Cercopid spittle bugs of the New World: Hemiptera,*  
511 *Auchenorrhyncha, Cercopidae*. 1. ed. Sofia Moscow: Pensoft (Pensoft series faunistica, 49).

512 Caspari, E. and Watson, G. (1959) ‘On the evolutionary importance of cytoplasmic sterility in  
513 mosquitoes’, *Evolution*, 13(4), pp. 568–570.

- 514 Cattel, J. *et al.* (2016) ‘*Wolbachia* in European populations of the invasive pest *Drosophila*  
515 *suzukii*: regional variation in infection frequencies’, *PLoS One*, 11(1), p. e0147766.
- 516 Chrostek, E. *et al.* (2017) ‘Horizontal transmission of intracellular insect symbionts via plants’,  
517 *Frontiers in Microbiology*, 8. doi: 10.3389/fmicb.2017.02237.
- 518 Conner, W. R. *et al.* (2017) ‘Genome comparisons indicate recent transfer of wRi-like  
519 *Wolbachia* between sister species *Drosophila suzukii* and *D. subpulchrella*’, *Ecology and*  
520 *Evolution*, 7(22), pp. 9391–9404.
- 521 Cooper, B. S. *et al.* (2017) ‘*Wolbachia* in the *Drosophila yakuba* complex: pervasive frequency  
522 variation and weak cytoplasmic incompatibility, but no apparent effect on reproductive  
523 isolation’, *Genetics*, 205(1), pp. 333–351.
- 524 Cooper, B. S. *et al.* (2019) ‘*Wolbachia* acquisition by *Drosophila yakuba*-clade hosts and  
525 transfer of incompatibility loci between distantly related *Wolbachia*’, *Genetics*, 212(4), pp.  
526 1399–1419.
- 527 Coyne, J. A. and Orr, H. A. (2004) *Speciation*. Sunderland, Massachusetts: Sinauer Associates.
- 528 Fagan, E. B. and Kuitert, L. C. (1969) ‘Biology of the Two-Lined Spittlebug, *Prosapia bicincta*,  
529 on Florida Pastures (Homoptera: Cercopidae)’, *The Florida Entomologist*, 52(3), pp. 199–206.  
530 doi: 10.2307/3493854.
- 531 Footitt, R. G., Maw, E. and Hebert, P. D. N. (2014) ‘DNA barcodes for Nearctic  
532 Auchenorrhyncha (Insecta: Hemiptera)’, *PloS One*, 9(7), p. e101385. doi:  
533 10.1371/journal.pone.0101385.
- 534 Fredericksen, M. A. *et al.* (2017) ‘Three-dimensional visualization and a deep-learning model  
535 reveal complex fungal parasite networks in behaviorally manipulated ants’, *Proceedings of the*  
536 *National Academy of Sciences*, 114(47), pp. 12590–12595. doi: 10.1073/pnas.1711673114.
- 537 Gerth, M. and Bleidorn, C. (2017) ‘Comparative genomics provides a timeframe for *Wolbachia*  
538 evolution and exposes a recent biotin synthesis operon transfer’, *Nature Microbiology*, 2(3), p.  
539 16241.
- 540 Gould, A. L. *et al.* (2018) ‘Microbiome interactions shape host fitness’, *Proceedings of the*  
541 *National Academy of Sciences*, 115(51), pp. E11951–E11960. doi: 10.1073/pnas.1809349115.
- 542 Hague, M. T. *et al.* (2020) ‘Environmental and genetic contributions to imperfect wMel-like  
543 *Wolbachia* transmission and frequency variation’, *Genetics*, 215(4), pp. 1117–1132.
- 544 Hague, M. T., Caldwell, C. N. and Cooper, B. S. (2020) ‘Pervasive effects of *Wolbachia* on host  
545 temperature preference’, *mBio*, 11(5).
- 546 Hamilton, K. G. A. (1977) ‘Review of the world species of *Prosapia* Fennah (Rhynchota:  
547 Homoptera: Cercopidae)’, *The Canadian Entomologist*, 109(4), pp. 621–630. doi:  
548 10.4039/Ent109621-4.

- 549 Hamilton, K. G. A. (1982) *The spittlebugs of Canada: Homoptera--Cercopidae*. Ottawa, Ont:  
550 Biosystematics Research Institute : Canadian Govt. Pub. Centre, Supply and Services Canada  
551 [distributor] (The Insects and arachnids of Canada, pt. 10).
- 552 Hamm, C. A. *et al.* (2014) ‘*Wolbachia* do not live by reproductive manipulation alone: infection  
553 polymorphism in *Drosophila suzukii* and *D. subpulchrella*’, *Molecular Ecology*, 23(19), pp.  
554 4871–4885.
- 555 Hoffmann, A. A., Clancy, D. and Duncan, J. (1996) ‘Naturally-occurring *Wolbachia* infection in  
556 *Drosophila simulans* that does not cause cytoplasmic incompatibility’, *Heredity*, 76(1), pp. 1–8.
- 557 Hoffmann, A. A. and Turelli, M. (1997) ‘Cytoplasmic incompatibility in insects’, in O’Neill, S.  
558 L., Hoffmann, A. A., and Werren, J. H. (eds) *Influential passengers: inherited microorganisms  
559 and arthropod reproduction*. Oxford University Press, pp. 42–80.
- 560 Hoffmann, A. A., Turelli, M. and Harshman, L. G. (1990) ‘Factors affecting the distribution of  
561 cytoplasmic incompatibility in *Drosophila simulans*.’, *Genetics*, 126(4), pp. 933–948.
- 562 Höhna, S. *et al.* (2016) ‘RevBayes: Bayesian phylogenetic inference using graphical models and  
563 an interactive model-specification language’, *Systematic Biology*, 65(4), pp. 726–736.
- 564 Hughes *et al.* (2011) ‘Variable infection frequency and high diversity of multiple strains of  
565 *Wolbachia pipientis* in *Perkinsiella* planthoppers’, *Applied and Environmental Microbiology*,  
566 77(6), pp. 2165–2168. doi: 10.1128/AEM.02878-10.
- 567 Hughes, G. *et al.* (2011) ‘*Wolbachia* infections in *Anopheles gambiae* cells: transcriptomic  
568 characterization of a novel host-symbiont interaction’, *PLoS pathogens*, 7(2), p. e1001296.
- 569 Huigens, M. E. *et al.* (2000) ‘Infectious parthenogenesis’, *Nature*, 405(6783), pp. 178–179. doi:  
570 10.1038/35012066.
- 571 Hurst, G. D. and Jiggins, F. M. (2000) ‘Male-killing bacteria in insects: mechanisms, incidence,  
572 and implications.’, *Emerging Infectious Diseases*, 6(4), pp. 329–336.
- 573 Jaenike, J. *et al.* (2006) ‘Asymmetrical Reinforcement and *Wolbachia* Infection in *Drosophila*’,  
574 *PLoS Biology*, 4(10), p. e325. doi: 10.1371/journal.pbio.0040325.
- 575 Kapantaidaki, D. E. *et al.* (2021) ‘Genetic and endosymbiotic diversity of Greek populations of  
576 *Philaenus spumarius*, *Philaenus signatus* and *Neophilaenus campestris*, vectors of *Xylella  
577 fastidiosa*’, *Scientific Reports*, 11(1), p. 3752. doi: 10.1038/s41598-021-83109-z.
- 578 Klasson, L. *et al.* (2008) ‘Genome evolution of *Wolbachia* strain wPip from the *Culex pipiens*  
579 group’, *Molecular Biology and Evolution*, 25(9), pp. 1877–1887. doi: 10.1093/molbev/msn133.
- 580 Klasson, L. *et al.* (2009) ‘The mosaic genome structure of the *Wolbachia* wRi strain infecting  
581 *Drosophila simulans*’, *Proceedings of the National Academy of Sciences*, 106(14), pp. 5725–  
582 5730.

- 583 Koga, R. *et al.* (2013) ‘Evolutionary replacement of obligate symbionts in an ancient and diverse  
584 insect lineage’, *Environmental Microbiology*, 15(7), pp. 2073–2081. doi:  
585 <https://doi.org/10.1111/1462-2920.12121>.
- 586 Koren, S. *et al.* (2017) ‘Canu: scalable and accurate long-read assembly via adaptive k-mer  
587 weighting and repeat separation’, *Genome Research*, p. gr.215087.116. doi:  
588 [10.1101/gr.215087.116](https://doi.org/10.1101/gr.215087.116).
- 589 Koren, S. *et al.* (2018) ‘De novo assembly of haplotype-resolved genomes with trio binning’,  
590 *Nature Biotechnology*, 36(12), pp. 1174–1182. doi: [10.1038/nbt.4277](https://doi.org/10.1038/nbt.4277).
- 591 Kriesner, P. *et al.* (2013) ‘Rapid sequential spread of two *Wolbachia* variants in *Drosophila*  
592 *simulans*’, *PLoS Pathogens*, 9(9), p. e1003607.
- 593 Kriesner, P. *et al.* (2016) ‘Persistence of a *Wolbachia* infection frequency cline in *Drosophila*  
594 *melanogaster* and the possible role of reproductive dormancy’, *Evolution*, 70(5), pp. 979–997.
- 595 LePage, D. P. *et al.* (2017) ‘Prophage WO genes recapitulate and enhance *Wolbachia*-induced  
596 cytoplasmic incompatibility’, *Nature*, 543(7644), p. 243.
- 597 Lindsey, A. R. I. *et al.* (2018) ‘Evolutionary genetics of cytoplasmic incompatibility genes cifA  
598 and cifB in prophage WO of *Wolbachia*’, *Genome Biology and Evolution*, 10(2), pp. 434–451.  
599 doi: [10.1093/gbe/evy012](https://doi.org/10.1093/gbe/evy012).
- 600 Lis, A., Maryańska-Nadachowska, A. and Kajtoch, Ł. (2015) ‘Relations of *Wolbachia* infection  
601 with phylogeography of *Philaenus spumarius* (Hemiptera: Aphrophoridae) populations within  
602 and beyond the Carpathian contact zone’, *Microbial Ecology*, 70(2), pp. 509–521. doi:  
603 [10.1007/s00248-015-0570-2](https://doi.org/10.1007/s00248-015-0570-2).
- 604 Loman, N. J., Quick, J. and Simpson, J. T. (2015) ‘A complete bacterial genome assembled de  
605 novo using only nanopore sequencing data’, *Nature Methods*, 12(8), pp. 733–735. doi:  
606 [10.1038/nmeth.3444](https://doi.org/10.1038/nmeth.3444).
- 607 Martinez, J. *et al.* (2020) ‘Life and death of selfish genes: comparative genomics reveals the  
608 dynamic evolution of cytoplasmic incompatibility’, *Molecular Biology and Evolution*,  
609 (msaa209). doi: [10.1093/molbev/msaa209](https://doi.org/10.1093/molbev/msaa209).
- 610 Matute, D. R. and Cooper, B. S. (2021) ‘Comparative studies on speciation: 30 years since  
611 Coyne and Orr’, *Evolution; International Journal of Organic Evolution*. doi: [10.1111/evo.14181](https://doi.org/10.1111/evo.14181).
- 612 McCutcheon, J. P., Boyd, B. M. and Dale, C. (2019) ‘The life of an insect endosymbiont from  
613 the cradle to the grave’, *Current Biology*, 29(11), pp. R485–R495. doi:  
614 [10.1016/j.cub.2019.03.032](https://doi.org/10.1016/j.cub.2019.03.032).
- 615 McFall-Ngai, M. *et al.* (2013) ‘Animals in a bacterial world, a new imperative for the life  
616 sciences’, *Proceedings of the National Academy of Sciences*, 110(9), pp. 3229–3236. doi:  
617 [10.1073/pnas.1218525110](https://doi.org/10.1073/pnas.1218525110).

- 618 Meany, M. K. *et al.* (2019) ‘Loss of cytoplasmic incompatibility and minimal fecundity effects  
619 explain relatively low *Wolbachia* frequencies in *Drosophila mauritiana*’, *Evolution*, 73(6), pp.  
620 1278–1295.
- 621 Miller, W. J., Ehrman, L. and Schneider, D. (2010) ‘Infectious speciation revisited: impact of  
622 symbiont-depletion on female fitness and mating behavior of *Drosophila paulistorum*’, *PLoS*  
623 *Pathogens*. Edited by C. Parrish, 6(12), p. e1001214. doi: 10.1371/journal.ppat.1001214.
- 624 Nakabachi, A. *et al.* (2020) ‘16S rRNA Sequencing Detected *Profftella*, *Liberibacter*,  
625 *Wolbachia*, and *Diplorickettsia* from Relatives of the Asian Citrus Psyllid’, *Microbial Ecology*,  
626 80(2), pp. 410–422. doi: 10.1007/s00248-020-01491-z.
- 627 Nurk, S. *et al.* (2020) ‘HiCanu: accurate assembly of segmental duplications, satellites, and  
628 allelic variants from high-fidelity long reads’, *Genome Research*, 30(9), pp. 1291–1305. doi:  
629 10.1101/gr.263566.120.
- 630 O’Neill, S. L. *et al.* (1992) ‘16S rRNA phylogenetic analysis of the bacterial endosymbionts  
631 associated with cytoplasmic incompatibility in insects’, *Proceedings of the National Academy of*  
632 *Sciences*, 89(7), pp. 2699–2702.
- 633 Peck, D. C. (1999) ‘Seasonal fluctuations and phenology of *Prosapia* Spittlebugs (Homoptera:  
634 Cercopidae) in upland pastures of Costa Rica’, *Environmental Entomology*, 28(3), pp. 372–386.  
635 doi: 10.1093/ee/28.3.372.
- 636 Rambaut, A. *et al.* (2014) *Tracer*. Available at: <http://beast.bio.ed.ac.uk/Tracer>.
- 637 Raychoudhury, R. *et al.* (2009) ‘Modes of acquisition of *Wolbachia*: horizontal transfer, hybrid  
638 introgression, and codivergence in the *Nasonia* species complex’, *Evolution*, 63(1), pp. 165–183.
- 639 Ross, P. A. *et al.* (2017) ‘*Wolbachia* infections in *Aedes aegypti* differ markedly in their response  
640 to cyclical heat stress’, *PLoS Pathogens*, 13(1), p. e1006006.
- 641 Ross, P. A. *et al.* (2020) ‘Heatwaves cause fluctuations in wMel *Wolbachia* densities and  
642 frequencies in *Aedes aegypti*’, *PLoS Neglected Tropical Diseases*, 14(1), p. e0007958. doi:  
643 10.1371/journal.pntd.0007958.
- 644 Schuler, H. *et al.* (2016) ‘The hitchhiker’s guide to Europe: the infection dynamics of an ongoing  
645 *Wolbachia* invasion and mitochondrial selective sweep in *Rhagoletis cerasi*’, *Molecular*  
646 *Ecology*, 25(7), pp. 1595–1609.
- 647 Seemann, T. (2014) ‘Prokka: rapid prokaryotic genome annotation’, *Bioinformatics*, 30(14), pp.  
648 2068–2069.
- 649 Shoemaker, D. D., Katju, V. and Jaenike, J. (1999) ‘*Wolbachia* and the evolution of reproductive  
650 isolation between *Drosophila recens* and *Drosophila subquinaria*’, *Evolution; International*  
651 *Journal of Organic Evolution*, 53(4), pp. 1157–1164. doi: 10.1111/j.1558-5646.1999.tb04529.x.

- 652 Shropshire, J. D. *et al.* (2018) ‘One prophage WO gene rescues cytoplasmic incompatibility in  
653 *Drosophila melanogaster*’, *Proceedings of the National Academy of Sciences*, 115(19), pp.  
654 4987–4991.
- 655 Shropshire, J. D. and Bordenstein, S. R. (2019) ‘Two-By-One model of cytoplasmic  
656 incompatibility: Synthetic recapitulation by transgenic expression of cifA and cifB in  
657 *Drosophila*’, *PLoS Genetics*, 15(6), p. e1008221. doi: 10.1371/journal.pgen.1008221.
- 658 Shropshire, J. D., Leigh, B. and Bordenstein, S. R. (2020) ‘Symbiont-mediated cytoplasmic  
659 incompatibility: what have we learned in 50 years?’, *eLife*. Edited by D. Weigel, 9, p. e61989.  
660 doi: 10.7554/eLife.61989.
- 661 Thompson, V. (2004) ‘Associative nitrogen fixation, C<sub>4</sub> photosynthesis, and the evolution of  
662 spittlebugs (Hemiptera: Cercopidae) as major pests of neotropical sugarcane and forage grasses’,  
663 *Bulletin of Entomological Research*, 94(3), pp. 189–200. doi: 10.1079/BER2004293.
- 664 Thompson, V. and Carvalho, G. S. (2016) ‘Abrupt geographical transition between aposematic  
665 color forms in the spittlebug *Prosapia ignipectus* (Fitch)(Hemiptera: Cercopidae).’, *Psyche*,  
666 2016, p. e3623092. doi: <https://doi.org/10.1155/2016/3623092>.
- 667 Thorne, M. S. *et al.* (2018) ‘Two-lined Spittlebug (*Prosapia bicincta* (Say)) in Hawaii’, p. 3.
- 668 Toju, H. *et al.* (2013) ‘Diversification of endosymbiosis: replacements, co-speciation and  
669 promiscuity of bacteriocyte symbionts in weevils’, *The ISME Journal*, 7(7), pp. 1378–1390. doi:  
670 10.1038/ismej.2013.27.
- 671 Turelli, M. *et al.* (2018) ‘Rapid global spread of wRi-like *Wolbachia* across multiple  
672 *Drosophila*’, *Current Biology*, 28(6), pp. 963–971.e8.
- 673 Turelli, M. and Hoffmann, A. A. (1991) ‘Rapid spread of an inherited incompatibility factor in  
674 California *Drosophila*’, *Nature*, 353(6343), pp. 440–442.
- 675 Turelli, M. and Hoffmann, A. A. (1995) ‘Cytoplasmic incompatibility in *Drosophila simulans*:  
676 Dynamics and parameter estimates from natural populations’, *Genetics*, 140(4), pp. 1319–1338.
- 677 Turelli, M., Lipkowitz, J. R. and Brandvain, Y. (2014) ‘On the Coyne and Orr-Igin of Species:  
678 Effects of intrinsic postzygotic isolation, ecological differentiation, X chromosome size, and  
679 sympatry on *Drosophila* speciation’, *Evolution*, 68(4), pp. 1176–1187. doi:  
680 <https://doi.org/10.1111/evo.12330>.
- 681 Weinert, L. A. *et al.* (2015) ‘The incidence of bacterial endosymbionts in terrestrial arthropods’,  
682 *Proceedings of the Royal Society B: Biological Sciences*, 282(1807), p. 20150249.
- 683 Werren, J. H., Baldo, L. and Clark, M. E. (2008) ‘*Wolbachia*: master manipulators of  
684 invertebrate biology’, *Nature Reviews Microbiology*, 6(10), pp. 741–751.



- 685 Wiwatanaratanabutr, I. (2015) ‘*Wolbachia* infection in leafhoppers and planthoppers: Diversity,  
686 density and geographic distribution in tropical rice agroecosystems’, *Journal of Asia-Pacific*  
687 *Entomology*, 18(2), pp. 277–282. doi: 10.1016/j.aspen.2015.03.004.
- 688 Wu, M. *et al.* (2004) ‘Phylogenomics of the reproductive parasite *Wolbachia pipientis* wMel: a  
689 streamlined genome overrun by mobile genetic elements’, *PLoS biology*, 2(3), p. e69.
- 690 Yang, Z. (1994) ‘Maximum likelihood phylogenetic estimation from DNA sequences with  
691 variable rates over sites: Approximate methods’, *Journal of Molecular Evolution*, 39(3), pp.  
692 306–314. doi: 10.1007/BF00160154.
- 693 Zug, R. and Hammerstein, P. (2012) ‘Still a host of hosts for *Wolbachia*: analysis of recent data  
694 suggests that 40% of terrestrial arthropod species are infected’, *PLoS One*, 7(6), p. e38544.
- 695

Supplemental Table 1. Spittlebugs from *Schizachyrium scoparium*, Maine and New Hampshire, August 2019 and 2020

| Locality        | Coordinates<br>North West |          | Date      | Sex | <i>Prosapia ignipectus</i> |                    |                       |                         | Other spittlebug species#   |                                    |                               |                                     |                                |       |
|-----------------|---------------------------|----------|-----------|-----|----------------------------|--------------------|-----------------------|-------------------------|-----------------------------|------------------------------------|-------------------------------|-------------------------------------|--------------------------------|-------|
|                 |                           |          |           |     | Color form                 |                    |                       |                         | Total<br>all color<br>forms | Total by<br>locality<br>both sexes | <i>Philaenarcys<br/>killa</i> | <i>Lepyronia<br/>quadrangularis</i> | <i>Philaenus<br/>spumarius</i> |       |
|                 |                           |          |           |     | Lined*                     |                    |                       |                         |                             |                                    |                               |                                     |                                | Black |
|                 |                           |          |           |     | Fully<br>lined             | Partially<br>lined | Pronotal<br>line only | Total with<br>any lines |                             |                                    |                               |                                     |                                | Black |
| New Vineyard ME | 44 45 14                  | 70 08 01 | 23-Aug-19 | ♂   | 0                          | 0                  | 0                     | 0                       | 12                          | 12                                 | 34                            |                                     |                                |       |
|                 |                           |          |           | ♀   | 0                          | 0                  | 0                     | 0                       | 22                          | 22                                 |                               |                                     |                                |       |
|                 |                           |          |           | ♀   | 0                          | 0                  | 0                     | 0                       | 22                          | 22                                 | 68                            |                                     | 4                              |       |
| New Portland ME | 44 52 17                  | 70 07 00 | 23-Aug-19 | ♂   | 39                         | 0                  | 0                     | 39                      | 0                           | 39                                 | 114                           |                                     |                                |       |
|                 |                           |          |           | ♀   | 75                         | 0                  | 0                     | 75                      | 0                           | 75                                 |                               |                                     |                                |       |
|                 |                           |          |           | ♀   | 20                         | 1                  | 0                     | 21                      | 0                           | 21                                 | 41                            |                                     |                                |       |
| Strong ME       | 44 47 08                  | 70 13 42 | 23-Aug-19 | ♂   | 0                          | 0                  | 0                     | 0                       | 6                           | 6                                  | 65                            |                                     |                                |       |
|                 |                           |          |           | ♀   | 1                          | 4                  | 1                     | 6                       | 53                          | 59                                 |                               |                                     |                                |       |
|                 |                           |          |           | ♀   | 0                          | 0                  | 0                     | 0                       | 14                          | 14                                 | 32                            |                                     | 5                              |       |
| Carthage ME     | 44 36 44                  | 70 28 10 | 23-Aug-19 | ♂   | 6                          | 3                  | 8                     | 17                      | 14                          | 31                                 | 169                           |                                     |                                |       |
|                 |                           |          |           | ♀   | 13                         | 38                 | 21                    | 67                      | 66                          | 138                                |                               |                                     |                                |       |
|                 |                           |          |           | ♀   | 7                          | 0                  | 9                     | 16                      | 10                          | 26                                 | 199                           |                                     | 5                              |       |
| Dixfield ME     | 44 34 10                  | 70 27 21 | 20-Aug-20 | ♂   | 1                          | 1                  | 2                     | 4                       | 3                           | 11                                 | 64                            |                                     |                                | 1     |
|                 |                           |          |           | ♀   | 2                          | 2                  | 7                     | 11                      | 31                          | 53                                 |                               |                                     | 3                              |       |
|                 |                           |          |           | ♀   | 0                          | 0                  | 0                     | 0                       | 2                           | 2                                  | 27                            |                                     |                                |       |
| Weld ME         | 44 41 27                  | 70 25 30 | 20-Aug-20 | ♂   | 0                          | 0                  | 0                     | 0                       | 11                          | 11                                 | 33                            |                                     |                                |       |
|                 |                           |          |           | ♀   | 0                          | 0                  | 0                     | 0                       | 22                          | 22                                 |                               |                                     |                                |       |
|                 |                           |          |           | ♀   | 0                          | 0                  | 0                     | 0                       | 25                          | 25                                 |                               |                                     | 1                              |       |
| Wonalancet NH   | 43 54 38                  | 71 21 29 | 17-Aug-20 | ♂   | 0                          | 0                  | 0                     | 0                       | 10                          | 10                                 | 32                            |                                     |                                | 1     |
|                 |                           |          |           | ♀   | 0                          | 0                  | 0                     | 0                       | 22                          | 22                                 |                               |                                     | 1                              |       |
|                 |                           |          |           | ♀   | 0                          | 0                  | 0                     | 0                       | 7                           | 7                                  | 20                            | 2                                   |                                |       |
| Silver Lake NH  | 43 53 01                  | 71 10 41 | 9-Aug-20  | ♂   | 0                          | 0                  | 0                     | 0                       | 13                          | 13                                 | 20                            | 2                                   |                                |       |
|                 |                           |          |           | ♀   | 0                          | 0                  | 0                     | 0                       | 7                           | 7                                  |                               | 2                                   |                                |       |
|                 |                           |          |           | ♀   | 0                          | 0                  | 0                     | 0                       | 4                           | 4                                  | 4                             | 33                                  |                                | 1     |
| West Ossipee NH | 43 50 15                  | 71 11 20 | 9-Aug-20  | ♂   | 0                          | 0                  | 0                     | 0                       | 4                           | 4                                  | 4                             | 33                                  |                                | 1     |
|                 |                           |          |           | ♀   | 0                          | 0                  | 0                     | 0                       | 0                           | 0                                  | 48                            |                                     |                                |       |
|                 |                           |          |           | ♀   | 0                          | 0                  | 0                     | 0                       | 0                           | 0                                  |                               |                                     |                                |       |

\*Note 1. Fully lined individuals had a single transverse orange line on the pronotum and two complete lines across the wings. Partially lined individuals were missing one wing line or had one or two interrupted or incomplete wing lines. Pronotum line only individuals lacked wing lines but possessed the pronotal line in full or in partially obscured form.

#Note 2. Other spittlebug species are recorded only for the 2020 collections, which included all specimens in this category tested for the presence of *Wolbachia*.

**Supplemental Table 2. PCR primers used in this study**

| <b>Primer Name</b>                       | <b>Sequence (5'-- 3')</b>        | <b>Reference</b>      |
|------------------------------------------|----------------------------------|-----------------------|
| <b>Mitochondrial <i>CoI</i></b>          |                                  |                       |
| <i>LepF</i>                              | 5'-ATTCAACCAATCATAAAGATATTGG-3'  | Hebert et al. (2004a) |
| <i>LepR</i>                              | 5'-TAAACTTCTGGATGTCCAAAAAATCA-3' | Hebert et al. (2004a) |
| <b>MLST</b>                              |                                  |                       |
| <i>coxA_F1</i>                           | 5'-TTGGRGCRATYAACTTTATAG-3'      | Baldo et al. 2006     |
| <i>coxA_R1</i>                           | 5'-CTAAAGACTTTKACRCCAGT-3'       | Baldo et al. 2006     |
| <i>gatB_F1</i>                           | 5'-GAKTTAAAYCGYGCAGGBGTT-3'      | Baldo et al. 2006     |
| <i>gatB_R1</i>                           | 5'-TGGYAAAYTCRGGYAAAGATGA-3'     | Baldo et al. 2006     |
| <i>hcpA_F1</i>                           | 5'-GAAATARCAGTTGCTGCAAA-3'       | Baldo et al. 2006     |
| <i>hcpA_R1</i>                           | 5'-GAAAGTYRAGCAAGYTCTG-3'        | Baldo et al. 2006     |
| <i>fbpA_F1</i>                           | 5'-GCTGCTCCRCTTGGYWTGAT-3'       | Baldo et al. 2006     |
| <i>fbpA_R1</i>                           | 5'-CCRCCAGARAAAAYYACTATTC-3'     | Baldo et al. 2006     |
| <i>fbpA_F3</i>                           | 5'-GTTAACCCTGATGCYYAYGAYCC-3'    | Baldo et al. 2006     |
| <i>fbpA_R3</i>                           | 5'-TCTACTTCCTTYGAYTCDCCRCC-3'    | Baldo et al. 2006     |
| <i>wsp_F1</i>                            | 5'-GTCCAATARSTGATGARGAAAC-3'     | Baldo et al. 2006     |
| <i>wsp_R1</i>                            | 5'-CYGCACCAAYAGYRCTRATAA-3'      | Baldo et al. 2006     |
| <i>ftsZunif</i>                          | 5'-GGYAARGGTGCRGCAGAAGA-3'       | Lo et al. 2002        |
| <i>ftsZunir</i>                          | 5'-ATCRATRCCAGTTGCAAG-3'         | Lo et al. 2002        |
| <b><i>Wolbachia</i> infection screen</b> |                                  |                       |
| <i>wsp_pcr_F</i>                         | 5'-TGGTCCAATAAGTGATGAAGAAAC-3'   | Braig et al. 1998     |
| <i>wsp_pcr_R</i>                         | 5'-AAAAATTAAACGCTACTCCA-3'       | Braig et al. 1998     |
| <i>28s_pcr_F</i>                         | 5'-TACCGTGAGGGAAAGTTGAAA-3'      | Werren et al. 1995    |
| <i>28s_pcr_R</i>                         | 5'-AGACTCCTTGGTCCGTGTTT-3'       | Werren et al. 1995    |
